# Supplementary material
Source: publisher figshare collection journal article supplement (https://frontiersin.figshare.com/ndownloader/files/22232766)
Supplement: Supplementary file [file 22232766]

**Supplementary Table 1** Leaf gas exchange parameters (photosynthetic rate ( $A_n$ ), stomatal conductance ( $g_s$ )), and water use efficiency at stomatal ( $WUE_i$ ) and at leaf level ( $WUE_{leaf}$ ) of inoculated and uninoculated maize grown in Greenhouse experiments during drought and recovery from drought. W 90% indicates well-watered treatment, D-R indicates the plants were drought treated and then re-watered. C indicates uninoculated control while FMCH001 indicates plants inoculated with seed coated *Bacillus licheniformis* sp. FMCH001. Values are means  $\pm$  SE. The output of two-way ANOVA is presented, where M indicates microbial inoculation, I indicates drought treatment, I x M indicates interaction between drought and microbial inoculation.

| Attributes      | $A_n$            | $g_s$           | $WUE_i$           | $WUE_{leaf}$    |
|-----------------|------------------|-----------------|-------------------|-----------------|
| Drought period  |                  |                 |                   |                 |
| C, W 90%        | 28.93 $\pm$ 1.19 | 0.24 $\pm$ 0.01 | 124.40 $\pm$ 3.53 | 6.26 $\pm$ 0.16 |
| FMCH001, W 90%  | 29.46 $\pm$ 1.21 | 0.20 $\pm$ 0.02 | 124.15 $\pm$ 9.11 | 6.22 $\pm$ 0.39 |
| C, D-R          | 9.46 $\pm$ 1.05  | 0.09 $\pm$ 0.01 | 61.79 $\pm$ 33.02 | 4.02 $\pm$ 0.13 |
| FMCH001, D-R    | 11.42 $\pm$ 1.69 | 0.13 $\pm$ 0.02 | 76.25 $\pm$ 36.87 | 4.46 $\pm$ 0.60 |
| P values        |                  |                 |                   |                 |
| I               | <0.001           | <0.001          | <0.001            | 0.069           |
| M               | 0.415            | 0.445           | 0.768             | 0.633           |
| I x M           | 0.634            | 0.175           | 0.812             | 0.565           |
| Recovery period |                  |                 |                   |                 |
| C, W 90%        | 19.98 $\pm$ 1.33 | 0.13 $\pm$ 0.01 | 146.04 $\pm$ 7.40 | 7.32 $\pm$ 0.24 |
| FMCH001, W 90%  | 16.88 $\pm$ 2.86 | 0.10 $\pm$ 0.02 | 163.94 $\pm$ 5.30 | 7.85 $\pm$ 0.30 |
| C, D-R          | 22.54 $\pm$ 1.46 | 0.14 $\pm$ 0.01 | 151.46 $\pm$ 3.88 | 7.76 $\pm$ 0.29 |
| FMCH001, D-R    | 17.71 $\pm$ 0.90 | 0.12 $\pm$ 0.00 | 135.39 $\pm$ 8.16 | 7.07 $\pm$ 0.16 |
| P values        |                  |                 |                   |                 |
| I               | 0.328            | 0.182           | 0.147             | 0.489           |
| M               | 0.038            | 0.108           | 0.903             | 0.726           |
| I x M           | 0.609            | 0.594           | 0.045             | 0.028           |
